# Supplementary material
Source: PubMed Central journal article supplement (PMC3725756)
Supplement: NIHMS492632-supplement-01.pdf [file NIHMS492632-supplement-01.pdf]

**Table Supplement 1. Pertinent negative candidate predictors from the multivariable linear model of annual eGFR<sub>cys</sub> change in HIV-infected participants (Table 4).**

|                                 | Adjusted effect (ml/min/1.73 m <sup>2</sup> per year)*, n = 554 |               |         |
|---------------------------------|-----------------------------------------------------------------|---------------|---------|
|                                 | Effect                                                          | 95% CI        | P value |
| Risk factors for kidney disease |                                                                 |               |         |
| Baseline proteinuria            | -0.10                                                           | (-1.81, 1.62) | 0.91    |
| HCV RNA+                        | -0.69                                                           | (-1.69, 0.32) | 0.18    |
| Heroin use                      | -0.28                                                           | (-1.30, 0.74) | 0.59    |
| C-reactive protein (CRP, log2)  | 0.21                                                            | (-0.01, 0.42) | 0.060   |
| Anti-retroviral drugs**         |                                                                 |               |         |
| Abacavir                        | -0.10                                                           | (-0.35, 0.15) | 0.42    |
| Tenofovir                       | 0.05                                                            | (-0.26, 0.36) | 0.73    |
| Indinavir                       | -0.16                                                           | (-0.55, 0.24) | 0.44    |
| Didanosine                      | 0.10                                                            | (-0.25, 0.45) | 0.56    |
| Efavirenz                       | 0.22                                                            | (-0.03, 0.47) | 0.089   |

\*Effect of adding each variable as a single additional predictor to the model shown in Table 4.

\*\*Per year of use through the follow-up visit.
